# Supplementary material for: Synthesis and self-assembly of a dual-responsive monocleavable ABCD star quaterpolymer
Source: Royal Society of Chemistry journal article supplement (doi:10.1039/c7py01638g), 2017-01-01
Supplement: c7py01638g1.pdf [file c7py01638g1.pdf]

## Supporting Information

### Synthesis and self-assembly of a dual-responsive monocleavable ABCD star quaterpolymer

Huanhuan Liu,<sup>a,b</sup> Jian Zhang,<sup>a</sup> Wenxue Dai<sup>a</sup> and Youliang Zhao<sup>\*a</sup>

<sup>a</sup> Suzhou Key Laboratory of Macromolecular Design and Precision Synthesis, Jiangsu Key Laboratory of Advanced Functional Polymer Design and Application, State and Local Joint Engineering Laboratory for Novel Functional Polymeric Materials, College of Chemistry, Chemical Engineering and Materials Science, Soochow University, Suzhou 215123, China. Tel: +86-512-65882045; E-mail: ylzhao@suda.edu.cn

<sup>b</sup> College of Pharmacy, Anhui University of Chinese Medicine, Hefei 230012, China

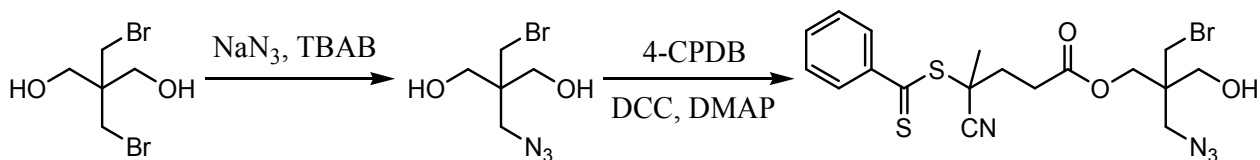

**Scheme S1** Synthetic routes to 2-azidomethyl-2-bromomethyl-3-hydroxypropyl 4-(benzodithiioyl)-4-cyanopentanoate (ABCP).

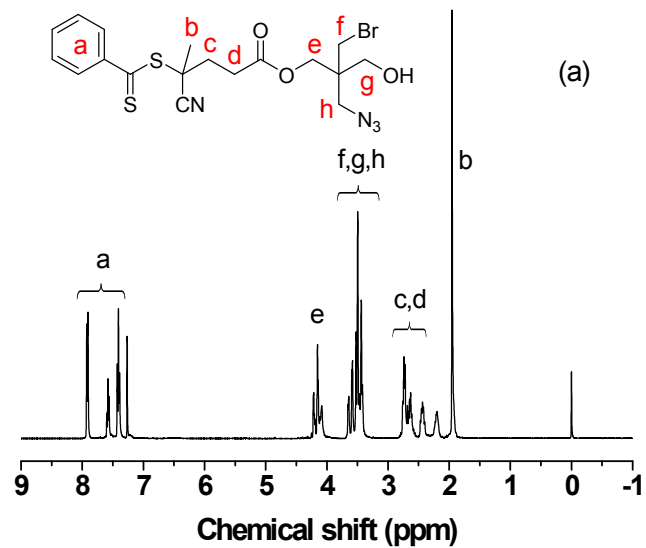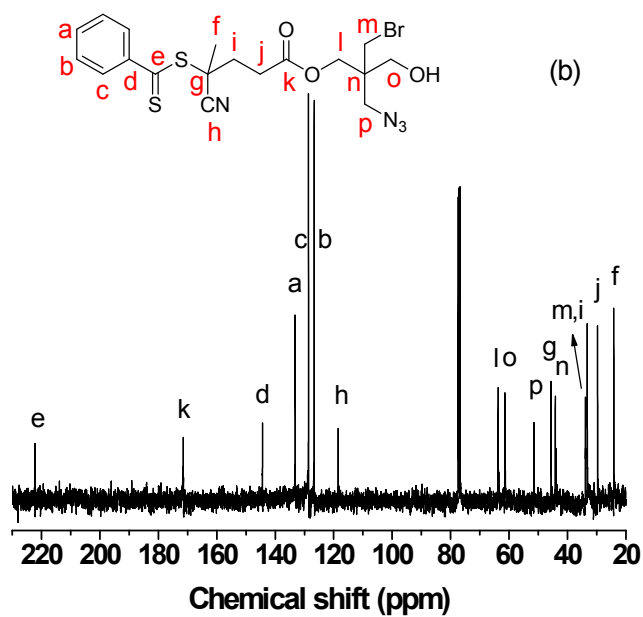

Fig. S1  $^1\text{H}$  (a) and  $^{13}\text{C}$  (b) NMR spectra of ABCP.

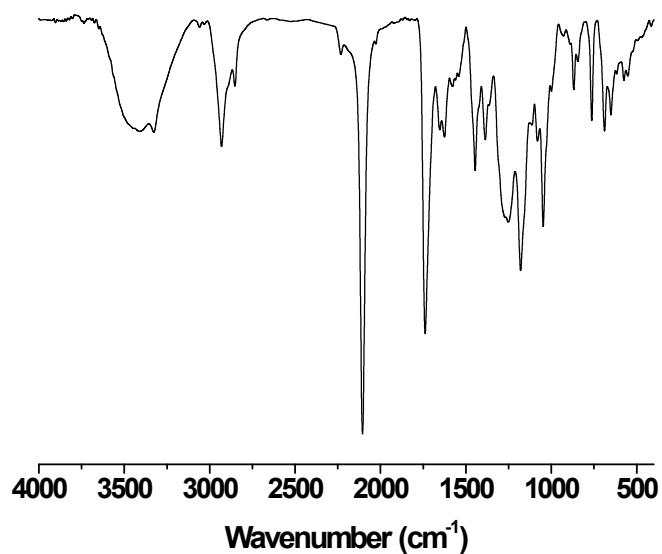

**Fig. S2** FT-IR spectrum of ABCP.

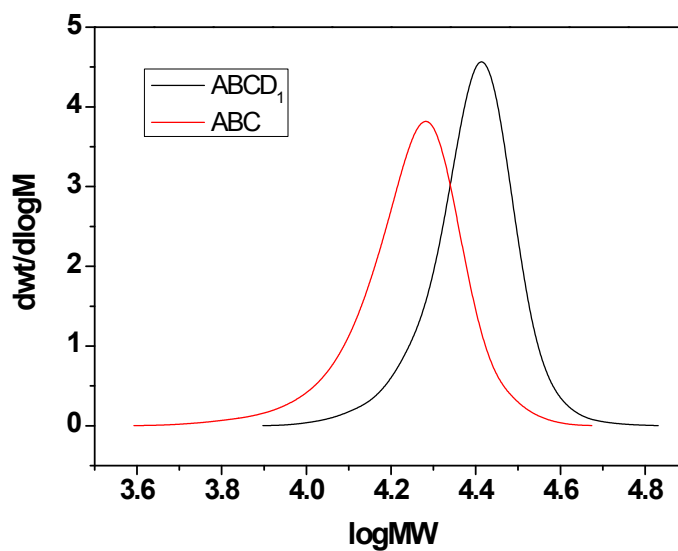

**Fig. S3** GPC traces of  $ABCD_1$  star ( $M_{n,LS} = 24200 \text{ g mol}^{-1}$ ,  $\bar{D} = 1.09$ ) and ABC star ( $M_{n,LS} = 17300 \text{ g mol}^{-1}$ ,  $\bar{D} = 1.10$ ) obtained by DTT-triggered cleavage of disulfide linkage of  $ABCD_2$  star and removal of PAA by precipitation into water, in which A = PEG, B = PSt, C = PCL,  $D_1 = PtBA$ , and  $D_2 = PAA$ .

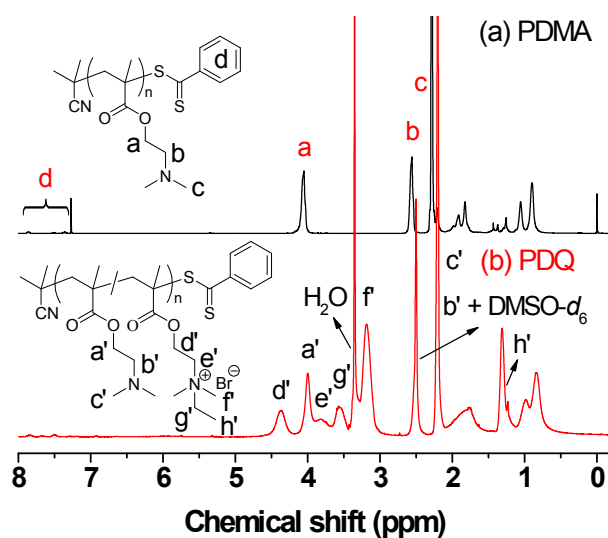

**Fig. S4**  $^1\text{H}$  NMR spectra of PDMA (a) in  $\text{CDCl}_3$  and P(DMA-*co*-QDMA) (abbreviated as PDQ, b) in  $\text{DMSO-}d_6$ .

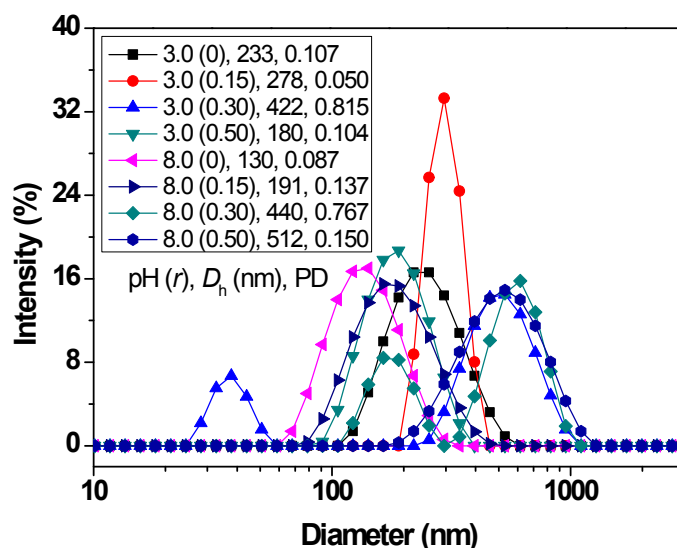

**Fig. S5** Influence of  $[\text{QDMA}^+]/[\text{COO}^-]$  ratio ( $r$ ) and pH on DLS plots of copolymer coaggregates formed from PEG-PSt-PCL-PAA star ( $c_{\text{star}} = 0.50 \text{ mg mL}^{-1}$ ) and P(DMA-*co*-QDMA) mixtures in aqueous solution at  $25^\circ\text{C}$ .
